1 **Operative and technical modifications to the Coriolis®  $\mu$  air sampler that improve sample**  
2 **recovery and biosafety during microbiological air sampling**

3

4 Nuno Rufino de Sousa<sup>1,\*</sup>, Lei Shen<sup>1,\*,<sup>¶</sup></sup>, David Silcott<sup>2</sup>, Charles J. Call<sup>3</sup>,  
5 Antonio Gigliotti Rothfuchs<sup>1,#</sup>

6

7 <sup>1</sup>Department of Microbiology, Tumor and Cell Biology (MTC), Karolinska Institutet,  
8 Stockholm, Sweden; <sup>2</sup>S3i, LLC, Reisterstown, Maryland, USA; <sup>3</sup>Zeteo Tech, LLC, Ellicott  
9 City, Maryland, USA.

10

11 #Address correspondence to Antonio Gigliotti Rothfuchs, MTC, Karolinska Institutet,  
12 Biomedicum, Solnavägen 9, SE-171 77 Stockholm, Sweden.

13 E-mail: ([antonio.rothfuchs@ki.se](mailto:antonio.rothfuchs@ki.se))

14

15 \*These authors contributed equally to this work.

16 <sup>¶</sup>Current address: Shanghai Pulmonary Hospital, Tongji University School of Medicine,  
17 Shanghai, China

18

19 Running title: Improved Coriolis air sampling

20

21 Key words: Coriolis, air sampling, infectious aerosols, biosafety, contamination

22

23 **ABSTRACT**

24           Detecting infectious aerosols is central for gauging and countering airborne threats. In  
25 this regard the Coriolis®  $\mu$  cyclonic air sampler is a practical, commercial collector that can be  
26 used with various analysis methods to monitor pathogens in air. However, information on how  
27 to operate this unit under optimal sampling and biosafety conditions is limited. We investigated  
28 Coriolis performance in aerosol dispersal experiments with polystyrene microspheres and  
29 *Bacillus globigii* spores. We report inconsistent sample recovery from the collector cone due  
30 to loss of material when sampling continuously for more than 30 min. Introducing a new  
31 collector cone every 10 min improved this shortcoming. Moreover, we found that several  
32 surfaces on the device become contaminated during sampling. Adapting a HEPA-filter system  
33 to the Coriolis prevented contamination without altering collection efficiency or tactical  
34 deployment. A Coriolis modified with these operative and technical improvements was used  
35 to collect aerosols carrying microspheres released inside a Biosafety Level-3 laboratory during  
36 simulations of microbiological spills and aerosol dispersals. In summary, we provide operative  
37 and technical solutions to the Coriolis that optimize microbiological air sampling and improve  
38 biosafety.

39

40 Abstract word count: 180

41

## 42 INTRODUCTION

43 *Mycobacterium tuberculosis*, measles virus, influenza virus and other highly  
44 contagious human pathogens transmit through air, either by aerosol or droplet transmission  
45 (Riley et al., 1978; Bloch et al., 1985; Remington et al., 1985; Fennelly et al., 2004; Yang et  
46 al., 2011; Cowling et al., 2013; Patterson et al., 2017). These airborne pathogens pose a heavy  
47 burden on society by incurring a spectrum of outcomes ranging from death to morbidity to  
48 absence from work due to sickness. Airborne microbes are of particular concern in enclosed,  
49 crowded environments, where occupants are readily exposed to respired air and thus at risk of  
50 inhaling infectious bioaerosols carrying viruses, bacteria or fungi. This is well-recognized  
51 during infection with *M. tuberculosis* where congregate settings such as prisons, homeless  
52 shelters, slums and refugee camps are recognized hotspots of transmission (WHO, 2009).

53 Bioaerosols are produced during coughing or sneezing (Nicas et al., 2005; Yang et al.,  
54 2007; Fernstrom and Goldblatt, 2013) and at lower concentrations during talking or breathing  
55 (Diffey, 2011; Fernstrom and Goldblatt, 2013). The concentration of bioaerosols in a given  
56 indoor setting depends on occupants' consumption of oxygen, respiratory quotient and physical  
57 activities (Persily, 1997; Emmerich and Persily, 2001), as well as physical factors of the indoor  
58 environment, such as ventilation rate, number of occupants and room volume (Persily, 1997;  
59 Emmerich and Persily, 2001; Lygizos et al., 2013). Since individuals spend the majority of the  
60 working hours of the day indoors (Diffey, 2011), enclosed environments pose a general risk  
61 for acquiring airborne infections.

62 Many advancements have been made in our understanding of aerosol formation and  
63 dispersion, on the risks of exposure and on ways to interfere with transmission of airborne  
64 pathogens. In this context, the ability to monitor pathogens in air is an important investment  
65 for gauging and controlling infectious disease in society. Microbiological air-sampling tools  
66 enable detection of pathogens in air and as such improve our position to counter airborne threats  
67 through capacity-building, infection control measures. In particular, there is an outstanding  
68 need to monitor pathogens in air in critical infrastructure such as government buildings,  
69 hospitals, mass transit and airports, during manufacturing in clean-rooms and "ready-to-eat"  
70 food preparation, to name but a few.

71 The Coriolis<sup>®</sup>  $\mu$  (Bertin Instruments, Montigny-le-Bretonneux, France) is a state-of-  
72 the-art, high-volume air sampler that collects airborne particles into liquid through cyclonic-  
73 air sampling. The unit is high-cost and energy-hungry but has tactical capacity and produces a  
74 sample that is compatible with many different analytical methods. The Coriolis has been used  
75 in a variety of air-sampling applications, including collection of chemical compounds (Caygill

76 et al., 2013), toxins (Viegas et al., 2012) and microbial contaminants in the food industry  
77 (Verreault et al., 2011; Viegas et al., 2014). It has also been used for surveillance of airborne  
78 pathogens in healthcare facilities (Le Gal et al., 2015; Montagna et al., 2017; Alsved et al.,  
79 2019; Montagna et al., 2019). It is known that during sampling the collecting cone loses a  
80 considerable amount of liquid, raising the possibility of inner contamination of the device and  
81 that longer sampling intervals may incur unintentional re-aerosolization and exposure of the  
82 microorganisms sampled for analysis, a situation of especial concern in the latter cases.

83 Despite its use in different microbiological air-sampling applications, investigation on  
84 actual Coriolis performance and biosafety concerns during operation have not been thoroughly  
85 addressed. Herein we have evaluated the Coriolis in a series of aerosol collection experiments  
86 with microspheres and bacterial spores under controlled laboratory conditions. We report on a  
87 sampling protocol to maximize sample recovery from the unit and a HEPA-filter adaptation to  
88 reduce unintentional contamination of device parts which occurs as a consequence of re-  
89 aerosolization of collected material during sampling. We demonstrate the use of the modified  
90 Coriolis in the detection of aerosols generated during a simulated laboratory spill and aerosol  
91 dispersal.

92

## 93 **METHODS**

### 94 ***Bacteria and fluorescent beads***

95 Lyophilized endospores of *Bacillus atrophaeus* var. *globigii* (*Bg*)(from ECBC Pine  
96 Bluff Arsenal Laboratories, US Army, originally given to D. Silcott) were resuspended in  
97 sterile deionized (DI) water. Quantification of *Bg* Colony-forming units (CFUs) in stocks and  
98 aerosol samples was determined by culture on LB Miller agar (Sigma-Aldrich) for one day at  
99 37 °C. Stock solutions of *Bg* were diluted to  $1 \times 10^9$  CFUs/mL and stored at 4 °C until further  
100 use. Stock solutions of 1 µm, yellow-green (505/515) fluorescent, polystyrene FluoSpheres™  
101 (ThermoFisher) were also prepared in DI water at  $1 \times 10^9$  beads/mL, stored at 4 °C and protected  
102 from light until further use.

103

### 104 ***Aerosol dispersal experiments in a containment chamber***

105 Contained aerosol dispersal experiments were performed inside a large, airtight,  
106 flexible PVC enclosure mounted on a metal-support frame (Solo Containment, UK). The  
107 enclosure measures 270 cm (L) x 165 cm (W) x 255 cm (H) with an inner volume of 9.3 m<sup>3</sup>. It  
108 was assembled and kept inside a Biosafety Level (BSL)-2 laboratory. Particles were purged  
109 from the chamber before the start of experiments by drawing air into the enclosure through a

110 HEPA filter using an Attix 30 industrial-grade vacuum cleaner (Nilfisk, Sweden).  
111 FluoSpheres or *Bg* were aerosolized into the chamber using a 4-jet Baustein atomizing module  
112 (BLAM) nebulizer (CH Technologies, USA) operated in multi-pass mode and producing quasi-  
113 monodisperse aerosols with a particle-size diameter range of 0.7-2.5  $\mu\text{m}$ . Aerosolization was  
114 performed for 1 min. Previous tests established a steady concentration of particles in the  
115 enclosure 8 min after completing the aerosolization cycle on the BLAM (**Fig. 2C**) and (data  
116 not shown); air sampling was therefore routinely initiated 8 min after finishing the  
117 aerosolization cycle. In certain experiments, a Lighthouse Handheld 3016 particle counter  
118 (Lighthouse Worldwide Solutions, USA) or an IBAC fluorescent particle counter (FLIR  
119 Systems, USA) were used to measure the decay of aerosolized FluoSpheres inside the  
120 enclosure.

121

### 122 ***Coriolis® $\mu$ function and HEPA-filter adaption***

123 A Coriolis®  $\mu$  cyclonic air sampler (Bertin Instruments, Montigny-le-Bretonneux,  
124 France) (**Fig. 1A**) was used to collect aerosolized microparticles in controlled, aerosol dispersal  
125 experiments. A bespoke solution for integrating a HEPA-filter system to the Coriolis was  
126 conceived and assembled as illustrated (**Fig. 1B**) with necessary filter component, stainless-  
127 steel metal tubing and other fittings (**Supplementary Fig. 1**) (all McMaster-Carr, USA). Air  
128 flow measurements were made on the Coriolis with a TSI 4040 mass flow meter (TSI, USA)  
129 connected to the blower inlet of the Coriolis using thin-wall latex tubing, stretched such that a  
130 tight seal was obtained on both the air-flow meter and the Coriolis inlet. Measurements were  
131 made at the manufacturer-specified flow rate setting of 300  $L_{\text{air}}/\text{min}$ . The flow rate measured  
132 was 298  $L_{\text{air}}/\text{min}$  without a collector cone (**Fig. 1A**) connected to the device. With a collector  
133 cone loaded with 15 mL connected to the Coriolis the flow rate measured was 270  $L_{\text{air}}/\text{min}$ .  
134 With the HEPA filter attached to the unit and loaded with a collector cone containing 15 mL,  
135 the flow rate at the inlet was 250  $L_{\text{air}}/\text{min}$ .

136 For experiments performed in the containment chamber, the Coriolis was placed on a  
137 table 30 cm away from the BLAM aerosol port with the collector part of the unit approximately  
138 100 cm from the ground. As per manufacturer's recommendation, the collector cones were  
139 filled with 15 mL DI water and kept sealed. After completion of the aerosolization cycle, a  
140 collector cone was unsealed, loaded onto the Coriolis and the sampler operated at the  
141 manufacturer-designated flow rate of 300  $L_{\text{air}}/\text{min}$ . Collection on the Coriolis was performed  
142 using the same cone for the entire sampling duration and referred to as *standard sampling*. In

143 this setting an injection port was used to manually replenish the collector cone back to 15 mL  
144 of DI water after every 10 min of sampling. Alternatively, a new collector cone containing  
145 15 mL of DI water was replaced after every 10 min of sampling, referred to as *cumulative*  
146 *sampling*. At the end of experiments, the enclosure was decontaminated with 35% hydrogen  
147 peroxide vapor using a BQ-50 unit (Bioquell, UK). Before starting this procedure, the  
148 removable metal piping was disassembled from the body of the Coriolis and the Coriolis  
149 operated in decontamination mode. Metal piping was cleaned in mild detergent and autoclaved.  
150

### 151 *Spill and aerosol dispersal experiments*

152 Laboratory spill and aerosol dispersal simulations were performed inside a suite of the  
153 BSL-3 facility at Biomedicum, Karolinska Institutet, Solna, Sweden. The suite dimensions  
154 measure 1000 cm (L) x 300 cm (W) x 270 cm (H). The facility operates at approximately 20-  
155 27 air-changes-per-hour (ACH) depending on the number of microbiological safety cabinets in  
156 simultaneous use. Safety cabinets in the suite were inactive during our experiments, lowering  
157 forced ventilation parameters to about 18 ACH. Our experiments were done before the BSL-3  
158 was opened to users and pathogens introduced to the facility. For spill simulations, the Coriolis  
159 was placed approximately 10 cm from the planned spill site and rested either on top of a  
160 working bench (90 cm from the ground) or just above the ground (30 cm). A large  
161 microbiological spill was simulated by tumbling a container carrying 0.5 L of FluoSpheres  
162 ( $2 \times 10^6$  beads/mL in DI water,  $1 \times 10^9$  beads in total) from the same working bench resting the  
163 Coriolis. For aerosol dispersal experiments, the Coriolis was placed on the working bench 90  
164 cm from the ground. The Coriolis was located 900 cm in front of the BLAM, which was  
165 supported on a tripod 100 cm from the ground. The BLAM was loaded with FluoSpheres  
166 ( $1 \times 10^9$  beads/mL). Aerosolization was performed for 1 min, releasing a maximum of  $1 \times 10^9$   
167 microspheres into the room. In both simulations, air sampling was performed on the Coriolis  
168 with accompanying HEPA-filter modification (**Fig. 1B**) for 1 hr using the cumulative sampling  
169 method described above. Researchers donned full-body Tyvek® 500 Labo overalls, 3M®  
170 FFP3D respirators, safety goggles and nitrile gloves (all VWR), providing all-around contact  
171 protection from aerosol exposure. At the end of experiments, working surfaces were cleaned  
172 with mild detergent and the entire BSL-3 suite was decontaminated with 35 % hydrogen  
173 peroxide vapor using a BQ-50 unit.

174

175 ***Swabbing and extraction of swab samples from Coriolis parts***

176 At the end of a collection cycle on the Coriolis, the aerosol chamber was purged from  
177 airborne particles as described above. The Coriolis was then swabbed using sterile cotton swabs  
178 (VWR) at the designated points P1-P11 in **Fig. 1C-D**. Sample was extracted from swabs by  
179 breaking the cotton-end of the swab into a sterile microcentrifuge tube. 0.5 mL PBS-0.05%  
180 Tween-80 was added to the tube, the tube was sealed, incubated at room temperature for 2 min  
181 and vortexed for 1 min. The cotton-end of the swab was then aseptically removed from the tube  
182 using a pair of sterile tweezers.

183

184 ***Calculation of particle clearance rate***

185 The particle clearance rate for aerosolized FluoSpheres in the aerosol chamber was  
186 obtained by dividing the inner volume of the chamber (9300 L) by the amount of time needed  
187 to reach a 4-Log reduction of the starting material of FluoSpheres aerosolized in the chamber  
188 (*i.e.* 99.99% clearance). The amount of time needed to reach a 4-Log reduction was calculated  
189 by fitting a one-phase decay curve to the particle counts measured in the chamber over time  
190 using designated particle counters (IBAC sensor and Lighthouse particle counter). The particle  
191 clearance rate for the Coriolis was expressed in  $L_{air}/min$ .

192

193 ***Flow cytometric quantification of FluoSpheres***

194 FluoSpheres collected on the Coriolis were quantified on a flow cytometer using  
195 CountBright™ Absolute Counting Beads (ThermoFisher). Briefly, a defined number of  
196 CountBright beads were added to 1 mL of sample, samples were acquired on a FACS Calibur  
197 (BD Biosciences) and analyzed on FlowJo (BD Biosciences). The number of FluoSpheres in  
198 the sample was calculated with CountBright™ beads according to the instructions of the  
199 manufacturer (ThermoFisher).

200

201 **Statistical analyses**

202 The significance of differences in data group means was analyzed using Student's *t* test  
203 or Anova where appropriate, with a cut-off of  $p < 0.05$ .

204



## 205 RESULTS

### 206 *Rapid decay of aerosolized particles from air during Coriolis sampling*

207 A robust air sampler must be able to effectively collect particles from air while also  
208 generating a sample that is amenable to downstream analysis. For the Coriolis (**Fig. 1A**), we  
209 investigated particle collection indirectly by measuring the unit's particle clearance rate, *i.e.*  
210 the rate at which the Coriolis removes airborne particles from air. Fluorescent polystyrene  
211 (1  $\mu\text{m}$ ) FluoSpheres were aerosolized in the aerosol chamber in the presence of the Coriolis  
212 and airborne particles measured in real-time with an IBAC sensor and a Lighthouse particle  
213 counter, respectively. When the Coriolis was turned *on* the number of airborne particles  
214 recorded in the chamber began to steadily decay and decreased about 1.5 orders of magnitude  
215 in 2 hrs (**Fig. 2A-B**). On the contrary, particle decay was not observed when the Coriolis was  
216 left *off* (**Fig. 2C**). With this information the effective clearance rate for the aerosolized  
217 microspheres was calculated to approximately 35  $L_{\text{air}}/\text{min}$ . This number was reached with the  
218 help of either particle counter. Additional size-discriminating particle analysis with the  
219 Lighthouse particle counter showed that the Coriolis struggled with particles smaller than  
220 0.3  $\mu\text{m}$  (**Fig. 2B**), in line with technical specifications reported by the manufacturer (Bertin  
221 Instruments).

222

### 223 *A cumulative sampling method that improves sample recovery during Coriolis air sampling*

224 Pathogen numbers in aerosols are limited. Thus, any protocol that improves collection  
225 or minimizes material loss adds value to the use of that collector during microbiological air  
226 sampling. We aerosolized FluoSpheres in the aerosol chamber and investigated their collection  
227 on the Coriolis over time to see if this process could be improved. Collection was performed  
228 every 10 min for a total of 2 hrs. The sample volume on the collector cone was manually  
229 replenished to 15 mL every 10 min as recommended by the manufacturer. Indeed, although the  
230 Coriolis is reported by the manufacturer to be able to collect material for up to 6 hrs, we found  
231 that sample recovery was inconsistent after 30 min of sampling (**Fig. 3A**). We hypothesized  
232 that the collected material might be escaping the collector cone over time as a consequence of  
233 cyclonic sampling. Hence, we modified the sampling procedure by replacing the collector cone  
234 after every 10-min cycle with a new one; analyzing each cone individually and cumulatively  
235 adding the quantification obtained from each time-point to the detection curve. At the end of  
236 the 2 hr-sampling interval we found that this *cumulative sampling* protocol lead to a 50%  
237 improvement of collection compared to the standard, manufacturer-recommended sampling  
238 with manual liquid replenishment (**Fig. 3A**). Analysis of material recovered from individual



239 time-points during cumulative sampling showed that approximately 95% of the FluoSpheres  
240 recovered during the 2hr-sampling interval were collected within the first 60 min (**Fig. 3B**).  
241 Still, an appreciable amount of microspheres were collected by the Coriolis during the  
242 remaining 60 min of sampling. Overall, our observations suggest that the cumulative sampling  
243 protocol may be especially useful for long-term sampling applications.

244

### 245 ***Bioaerosol contamination of device parts during sampling***

246 Given that sample recovery decreased with increasing sampling time, we asked whether  
247 sampled material redistributed to other parts of the Coriolis during operation. To investigate  
248 this, we decided to swab various surfaces of the Coriolis after air sampling to see if any parts  
249 other than the collector cone became positive after collection. We chose to aerosolize *Bacillus*  
250 *globigii* (*Bg*) spores, the Anthrax simulant, since we have successfully extracted *Bg* by surface  
251 swabs in the past (Rufino de Sousa et al., 2020). Thus, we aerosolized *Bg* spores in the chamber  
252 and used the Coriolis to collect *Bg* bioaerosols. We then investigated regrowth of *Bg* from  
253 different parts of the Coriolis, more specifically, the collector cone and parts P1-P11 according  
254 to the schematics in (**Fig. 1C**). We found that many surfaces on the device exposed to air flow  
255 were contaminated with *Bg*. Substantial regrowth of *Bg* was obtained from the headpiece inlet  
256 (P1) where air enters the device (**Fig. 4A**). Bacilli were also readily detected at the initial tubing  
257 after the collector cone (P2) and importantly, at the air outlet (P11) (**Fig. 4A**), suggesting that  
258 bacteria may become deposited on the unit's fan as well. This raises overall concerns regarding  
259 user safety, deposition of contaminants on the fan over time and the validity of samples  
260 analyzed on the unit.

261 In an attempt to improve device function and tactical deployment, we tailored and  
262 adapted a HEPA-filter system to the Coriolis (**Fig. 1B and D**)(**Supplementary Fig. 1**) and  
263 repeated *Bg* aerosol sampling. The HEPA filter significantly reduced *Bg* contamination from  
264 the piping (P7-P10) going into the body of the Coriolis (**Fig. 4A**). Spiking the collector cone  
265 with *Bg* confirmed that at least part of this contamination originated from re-aerosolization of  
266 bacilli in the collector cone, as the pattern of *Bg* deposition on the Coriolis was similar after  
267 aerosol dispersal (**Fig. 4A**) and spiking (**Fig. 4B**). Reducing buffer volume on the collector  
268 cone from 15 mL to 5 mL produced the same result (data not shown), suggesting that re-  
269 aerosolization was independent of the buffer volume in the cone. Importantly, there was no  
270 bacillary regrowth from the air outlet (P11) of the HEPA-modified Coriolis when the collector  
271 cone was spiked with *Bg* (**Fig. 4B**), indicating that the fan was protected from contamination  
272 in the presence of the HEPA filter. *Bg* could be detected on the outlet (P11) of the HEPA-

273 modified unit after aerosol sampling (**Fig. 4A**). Since the HEPA filter prevents access to the  
274 outlet (P11) during spiking, detection here must be due to the high concentration of *Bg* aerosols  
275 inside the chamber, promoting deposition of bacilli onto the outside surface of the outlet, rather  
276 than a contamination coming from the inside the unit. Lastly, introducing the HEPA filter did  
277 not negatively impact on the effective clearance rate of the Coriolis (**Fig. 4C-D**).

278

### 279 *Use of the modified Coriolis to collect aerosols generated during a spill and aerosol* 280 *dispersal*

281 Despite biosafety and other regulatory precautions in place, the research laboratory  
282 remains an indoor environment where infections are acquired, albeit unintentionally, due to  
283 accidental exposure (Sulkin and Pike, 1951; Pike et al., 1965; Pike, 1976). With this in mind  
284 we sought to use the Coriolis with the above operative and technical modifications to  
285 investigate aerosols generated during simulated microbiological accidents in a laboratory work  
286 place. We simulated spills and aerosol dispersals in a functional BSL-3 infrastructure before it  
287 was opened to users.

288 To simulate a large microbiological spill, we dropped a container with 0.5 L of DI water  
289 carrying a total of  $1 \times 10^9$  (1  $\mu\text{m}$ ) FluoSpheres over the edge of a designated working surface in  
290 the BSL-3. A particle counter was used to record particle dispersal from the spill. Airborne  
291 FluoSpheres were collected on the Coriolis and quantified by flow cytometry. The impaction  
292 of liquid on the ground was accompanied by a detectable peak of 0.3, 0.5 and 1  $\mu\text{m}$  particles  
293 close to the ground (**Fig. 5A**). To our surprise, the number of particles generated by this large  
294 liquid impaction were only marginally above baseline-particle counts in the room. Levels  
295 returned to steady-state about 10 min after the spill and were altogether undetectable when  
296 measured at the height of the working bench from which the spill was generated (**Fig. 5A**).  
297 Despite the generation of few airborne particles from this simulation, it was nevertheless  
298 possible to use the Coriolis in conjunction with flow cytometry to detect FluoSpheres  
299 aerosolized from the spill (**Fig. 5B**).

300 Next, we tested Coriolis sampling during aerosol dispersal of the same amount of  
301 FluoSpheres but on a BLAM aerosol generator. A similar peak with albeit much higher particle  
302 counts was observed concomitant with the aerosolization of these microspheres on the BLAM  
303 (**Fig. 6A**). In line, significant numbers of FluoSpheres were detected by Coriolis air sampling  
304 (**Fig. 6B**) and followed the general decay of particles in the BSL-3 suite due to forced  
305 ventilation. When central ventilation in the suite was intentionally turned *off* and the  
306 experiment repeated, airborne particle counts were increased further and remained elevated for

307 the duration of the experiment without returning to baseline (**Fig. 6C**). Consistent with elevated  
308 and steady detection of particles in the room when central ventilation was inactivated, the  
309 Coriolis collected an elevated, steady number of FluoSpheres in the air (**Fig. 6D**). Overall,  
310 these spill and aerosol dispersal experiments reinforce the capacity of the Coriolis to enable  
311 detection of aerosolized microparticles from settings where these particles are present in not  
312 only high but also low amounts.

313

## 314 **DISCUSSION**

315 The first line in protective measures against microbiological airborne threats is the  
316 ability to detect the pathogen in air, as it enables the mounting of adequate countermeasures in  
317 the next step, such as treatment, containment or disinfection, which greatly limits human  
318 exposure, prevent illness and save lives. This requires microbiological air-sampling tools that  
319 can be used in conjunction with analysis methods to rapidly detect microbes in air. In this  
320 regard, portable, tactical collectors are particularly useful in infection control as they can be  
321 widely distributed throughout society for air surveillance and research purposes. The  
322 Coriolis<sup>®</sup>  $\mu$  is a commercially-available, fieldable solution for air sampling that uses cyclonic  
323 technology to collect airborne particles directly into 15 mL buffer. Our study presents operative  
324 and technical modifications to the Coriolis to circumvent caveats during sampling and to  
325 improve its deployment. Building on the increasing number of applications for this collector,  
326 we reveal its suitability in collecting aerosols generated through simulated spills or  
327 experimental aerosolization in a BSL-3 laboratory.

328 The capacity of an air sampler to pull and precipitate airborne particles onto its collector  
329 piece is a bottleneck in the sampling process. In addition, since the amount of a target pathogen  
330 in air is expected to be low, successful detection may require both continuous monitoring and  
331 high-volume air sampling. Knowing an air sampler's particle collection efficiency (Ladhani et  
332 al., 2017; Kim et al., 2018), may help identify the sampling conditions needed for successful  
333 collection, but useful, *bona fide* metrics for this measurement are difficult to obtain. Important  
334 previous work has generated measurements of relative sampling efficiency for several air  
335 samplers by benchmarking collection against the SKC BioSampler, showing that the Coriolis  
336 performed equally well against several aerosol-test agents including *Bg* and fluorescent  
337 microspheres (Dybwad et al., 2014). In our investigation of Coriolis performance, we evaluated  
338 the rate at which airborne microparticles were removed from the air during active sampling  
339 and report an effective clearance rate of approximately 35  $L_{air}/min$ . This is the rate at which the

340 Coriolis clears 1  $\mu\text{m}$  particles from air and not a direct measure of particle collection on the  
341 device. Still, this value could be used to estimate operation time in a given volume.

342 Coriolis collection greatly suffered from the harsh nature of cyclonic sampling as we  
343 observed sample loss and re-aerosolization from the collector cone. Both could contribute to  
344 misleading analysis results. Re-aerosolization was responsible at least in part for disseminating  
345 collected particles to various other parts of the sampler. This could inadvertently expose the  
346 user to pathogens during microbiological air sampling. Introduction of a cumulative sampling  
347 protocol and a HEPA-filter adaptation to the device improved these shortcomings. We have  
348 recently used the HEPA-modified Coriolis with the cumulative sampling protocol in our  
349 aerosol chamber to investigate the performance of a portable electrostatic air sampler for  
350 tuberculosis (Rufino de Sousa et al., 2020). A similar HEPA-modified Coriolis has also been  
351 used in a clinical, experimental setting to quantify *M. tuberculosis* from human bioaerosols  
352 (Patterson et al., 2017). In the current study we provide a thorough presentation of these  
353 technical and operational improvements to the Coriolis and supply details for assembly of the  
354 HEPA filter so that others can benefit from this adaptation. The HEPA-modified Coriolis  
355 operates otherwise like the standard, commercially-available unit. We observed a small  
356 increase in Coriolis particle clearance rate upon mounting the HEPA filter. This is probably  
357 due to the HEPA filter trapping airborne particles that would otherwise be subject to continuous  
358 re-circulation through the device during operation.

359 Despite many safety precautions and protective measures, handling live pathogens in  
360 the laboratory is a standing risk for occupational exposure, even to the most experienced staff.  
361 We thought it interesting to employ the Coriolis with improvements in the assessment of  
362 simulated incidents in the laboratory coupled to microbiological exposure. Here, collectors  
363 such as the Coriolis may bring important insight on exposure that may impact on future  
364 biosafety regulations and recommendations. In this context, following a substantial  
365 microbiological spill, it is generally recommended by biosafety delegates that personnel should  
366 vacate the room for 20-30 minutes due to the risk of exposure to aerosols (WHO, 2004).  
367 Cleaning and decontamination procedures are consequently delayed although robust  
368 experimental support for this risk assessment is missing. Using the Coriolis and particle  
369 counters, we show that a simulated spill with a large, concentrated volume of microspheres  
370 does not generate a significant number of aerosol particles in the environment. Because few  
371 airborne particles were generated in the spill, it might not have been a preferred simulation to  
372 study Coriolis performance. Nonetheless, it gave insight into an important and common

373 biosafety issue related to microbiological exposure in the laboratory work environment. Our  
374 data thus suggests that infection control measures can be applied immediately after a large  
375 microbiological spill since the risk of aerosol dissemination and exposure to the user in this  
376 condition is negligible. It is unclear to what degree dust particulates from a surface could be  
377 re-aerosolized during a spill to potentiate airborne particles and microbial exposure.  
378 *B. anthracis* spores have been reported to be re-aerosolized from contaminated office surfaces  
379 under conditions of low personnel activity (Weis et al., 2002). A review of historical data on  
380 tuberculosis transmission highlights the risk of dust-borne *M. tuberculosis* in spreading the  
381 infection (Martinez et al., 2019). A premise for our recommendation of immediate  
382 decontamination is therefore that it be performed on laboratory surfaces that are otherwise kept  
383 clean and accumulation of dust minimized.

384 In the unique setting of our BSL-3 infrastructure with forced ventilation, we also used  
385 the Coriolis to investigate detection of aerosols carrying microspheres aerosolized on a BLAM,  
386 a Collison-type nebulizer. Collison nebulizers are readily used to experimentally infect  
387 laboratory animals through the aerosol route (May, 1973; Roy and Pitt, 2012). This experiment  
388 thus simulates a potential incident in an animal BSL-3 or aerobiology laboratory with ensuing  
389 infectious bioaerosol dispersal. Even though forced ventilation returned particle counts in the  
390 room to background levels within 15 min after the simulated incident, microspheres could be  
391 detected with the aid of the Coriolis up to 1 hr after aerosol release. In the absence of forced  
392 ventilation, particle numbers remained high and elevated for the entire duration of the  
393 experiment. These experiments reveal the importance of ventilation in limiting transmission of  
394 infectious bioaerosols. They also indicate that the risk of exposure remains for at least 1 hr after  
395 a *bona fide* aerosolization, even in the presence of forced ventilation. Thus, our simulations  
396 show that an accident with an aerosol generator introduces a much higher risk for occupational  
397 exposure compared to a large (0.5 L) microbiological spill.

398

## 399 **CONCLUSION**

400 The field of aerobiology has been hampered by the lack of tactical (fieldable) units for  
401 microbiological air-sampling. Units such as the Coriolis are helping to fill this gap by providing  
402 a useful tool for the study and quantification of infectious bioaerosols. Our simple operative  
403 and technical modifications to the Coriolis should add to its biosafe deployment and promote  
404 continued investigation on human transmission and exposure to airborne pathogens.

405

## 406 **Funding**

407 This work was funded by the Bill and Melinda Gates Foundation (grant number  
408 OPP1118552), Karolinska Innovations AB, and Karolinska Institutet, all to A.G.R. The funders  
409 had no role in study design, data collection and interpretation, or the decision to submit the  
410 work for publication.

411

## 412 **Acknowledgments**

413 We thank Roland Möllby (Karolinska Institutet, Sweden) and Wayne Bryden (Zeteo  
414 Tech, USA) for suggestions and critical reading of this manuscript. We would also like to thank  
415 Sören Hartmann and Per-Erik Björk (Karolinska Institutet) and Erik Ekstedt (Akademiska Hus  
416 AB, Stockholm, Sweden) for technical assistance. Flow cytometry was performed at the  
417 Biomedicum Flow Cytometry Core facility (BFC), Department of Microbiology, Tumor and  
418 Cell Biology, Biomedicum, Karolinska Institutet.

419

## 420 **Author Disclosure Statement**

421 The authors declare no conflicts of interest.

422

## 423 **FIGURE LEGENDS**

424 **Figure 1.** Coriolis®  $\mu$  and HEPA-filter adaptation. **A**, Coriolis as supplied by vendor  
425 with accompanying parts (left panel) including collector cone (right-center panel). **B**, Coriolis  
426 after incorporation of customized HEPA-filter adaptation with parts presented in  
427 **Supplementary Fig. 1**. Scale bars depicting 10 cm. **C-D**, Cartoon of Coriolis internal  
428 components without (**C**) and with HEPA filter (**D**). Arrows in red showing direction of sampled  
429 air through the device. P1-P11 denotes locations from which swabs were obtained for regrowth  
430 of *Bg* in experiments presented in **Fig. 4A-B**.

431

432 **Figure 2.** Clearance of aerosolized microspheres from air during Coriolis sampling. **A-**  
433 **C**, FluoSpheres (1  $\mu\text{m}$ ,  $1 \times 10^9$ ) were aerosolized inside the aerosol chamber. Coriolis was turned  
434 *on* or left *off* (dashed line) and particle counters used to record microspheres in the air. **A**,  
435 Fluorescent particle counts recorded on an IBAC sensor with Coriolis *on*. **B-C**, Particle counts  
436 recorded on a Lighthouse particle counter with Coriolis *on* (**B**) and at steady state with Coriolis  
437 *off* (**C**).

438



439 **Figure 3.** Cumulative sampling improves sample recovery from Coriolis during  
440 prolonged air sampling. FluoSpheres ( $1\ \mu\text{m}$ ,  $1 \times 10^9$ ) were aerosolized in the aerosol chamber  
441 as in **Fig. 2** and collected on the Coriolis (**Fig. 1A**). **A**, FluoSpheres were aerosolized in the  
442 chamber and Coriolis sampling performed continuously (Standard) or according to the  
443 *cumulative sampling* method described in the text (Cumulative). FluoSpheres collected on the  
444 Coriolis were quantified by flow cytometry. Each time point represents a separate aerosol  
445 release. For *cumulative sampling*, the number of recovered FluoSpheres from a time point is  
446 summed to the counts obtained from previous time points and graphed, meaning that each data  
447 point is showing the cumulative value of the collection up to that time point. **B**, alternative  
448 representation of data following *cumulative sampling* in (**A**) showing recovered material from  
449 each time point, *i.e.*, individual collector cones. Data from 5 experimental repeats shown. Error  
450 bars show standard error of the mean. \* denotes statistically significant differences between  
451 Standard and Cumulative sampling methods.

452

453 **Figure 4.** Regrowth of *Bg* from different parts of the Coriolis before and after  
454 introduction of the HEPA-filter system. **A**, *Bg* spores ( $1 \times 10^8$  CFUs) were aerosolized inside  
455 the aerosol chamber and sampled for 1 hr on the Coriolis without (**Fig. 1A**) or with the HEPA-  
456 filter adaptation (**Fig. 1B**). Surface swabs were obtained from positions P1-P11 on the Coriolis  
457 (**Fig. 1C-D**). Regrowth of *Bg* from surface swabs and the collector cone was quantified on LB  
458 agar and graphed as total number of CFUs. **B**, *Bg* spores ( $1 \times 10^8$  CFUs) were loaded directly  
459 into the collector cone, the Coriolis was turned *on* for 1 hr and *Bg* regrowth investigated as in  
460 (**A**). **C-D**, FluoSpheres ( $1\ \mu\text{m}$ ,  $1 \times 10^9$ ) were aerosolized inside the aerosol chamber. Coriolis  
461 with the HEPA modification was turned *on* (dashed line) while particle counters were used to  
462 record airborne microspheres in the air. **C**, Fluorescent particle counts recorded on an IBAC  
463 sensor. **D**, Particle counts recorded on a Lighthouse particle counter. Data from 5 experimental  
464 repeats shown. Dots represent individual measurements. Bar graphs depict average of CFUs  
465 obtained. Error bars show standard error of the mean. \* denotes statistically significant  
466 differences between Coriolis with and without the HEPA-filter modification.

467

468 **Figure 5.** Simulation of a microbiological spill inside a BSL-3 laboratory. **A**, 0.5 L of  
469 DI water containing a total of  $1 \times 10^9$  FluoSpheres was decanted from a working surface 90 cm  
470 from the ground. A Lighthouse particle counter was used to record airborne particles at 30 cm  
471 from the ground, *i.e.* as close to the ground as possible (left panel), or 90 cm from the ground,  
472 on the working surface (right panel). **B**, The same spill was repeated and Coriolis air sampling



473 performed with a HEPA-modified unit using the cumulative sampling method. FluoSpheres  
474 collected on the Coriolis were quantified by flow cytometry. Detection of FluoSpheres at 30  
475 cm (left panel) or 90 cm (right panel) from the ground. Data from 5 experimental repeats  
476 shown. Error bars depict standard error of the mean. Dashed line indicates time of spill.

477

478 **Figure 6.** Aerosol release inside a BSL-3 laboratory. **A-D**, FluoSpheres ( $1\ \mu\text{m}$ ,  $1 \times 10^9$ )  
479 were aerosolized inside a BSL-3 suite in the presence (**A-B**) or absence of forced ventilation  
480 (**C-D**). A Lighthouse particle counter was used to record airborne particles in the room. Coriolis  
481 air sampling was done with a HEPA-modified unit using the cumulative sampling method. **A**  
482 and **C**, Particle counts in the suite following aerosol dispersal. **B** and **D**, Detection of airborne  
483 FluoSpheres on the Coriolis determined by flow cytometry. Data from 3 experimental repeats  
484 shown. Error bars depict standard error of the mean. Dashed line indicates time of aerosol  
485 dispersal.

486

487 **Supplementary Figure 1.** Parts description for Coriolis HEPA adaptation. Photograph  
488 and parts description including catalog number (all MacMaster-Carr, USA) for assembly of  
489 HEPA adaptation, amounting in all to about 745 USD (2020). Scale bar depicting 10 cm.

490

## 491 REFERENCES

492 Alsved M, Fraenkel C-J, Bohgard M, Widell A, Söderlund-Strand A, Lanbeck P, Holmdahl T,  
493 Isaxon C, Gudmundsson A, Medstrand P, et al. (2019) Sources of Airborne Norovirus in  
494 Hospital Outbreaks. *Clinical Infectious Diseases*.  
495 Bloch AB, Orenstein WA, Ewing WM, Spain WH, Mallison GF, Herrmann KL, Hinman AR.  
496 (1985) Measles outbreak in a pediatric practice: airborne transmission in an office setting.  
497 *Pediatrics*; 75: 676-83.  
498 Caygill JS, Collyer SD, Holmes JL, Davis F, Higson SPJ. (2013) Electrochemical Detection of  
499 TNT at Cobalt Phthalocyanine Mediated Screen-Printed Electrodes and Application to  
500 Detection of Airborne Vapours. *Electroanalysis*; 25: 2445-52.  
501 Cowling BJ, Ip DK, Fang VJ, Suntarattiwong P, Olsen SJ, Levy J, Uyeki TM, Leung GM,  
502 Malik Peiris JS, Chotpitayasunondh T, et al. (2013) Aerosol transmission is an important mode  
503 of influenza A virus spread. *Nat Commun*; 4: 1935.  
504 Diffey BL. (2011) An overview analysis of the time people spend outdoors. *Br J Dermatol*;  
505 164: 848-54.

- 506 Dybwad M, Skogan G, Blatny JM. (2014) Comparative testing and evaluation of nine different  
507 air samplers: End-to-end sampling efficiencies as specific performance measurements for  
508 bioaerosol applications. *Aerosol Science and Technology*; 48: 282-95.
- 509 Emmerich SJ, Persily AK. (2001) State-of-the-Art Review of CO<sub>2</sub> Demand Controlled  
510 Ventilation Technology and Application. USA: Diane Pub Co.
- 511 Fennelly KP, Martyny JW, Fulton KE, Orme IM, Cave DM, Heifets LB. (2004) Cough-  
512 generated aerosols of *Mycobacterium tuberculosis*: a new method to study infectiousness.  
513 *American Journal of Respiratory and Critical Care Medicine*; 169: 604-9.
- 514 Fernstrom A, Goldblatt M. (2013) Aerobiology and its role in the transmission of infectious  
515 diseases. *Journal of Pathogens*; 2013: 493960.
- 516 Kim HR, Park J-w, Kim HS, Yong D, Hwang J. (2018) Comparison of lab-made electrostatic  
517 rod-type sampler with single stage viable impactor for identification of indoor airborne  
518 bacteria. *Journal of Aerosol Science*; 115: 190-97.
- 519 Ladhani L, Pardon G, Meeuws H, van Wesenbeeck L, Schmidt K, Stuyver L, van der Wijngaart  
520 W. (2017) Sampling and detection of airborne influenza virus towards point-of-care  
521 applications. *PLoS One*; 12: e0174314-e14.
- 522 Le Gal S, Pougnet L, Damiani C, Fréalle E, Guéguen P, Virmaux M, Ansart S, Jaffuel S,  
523 Couturaud F, Delluc A, et al. (2015) *Pneumocystis jirovecii* in the air surrounding patients with  
524 *Pneumocystis* pulmonary colonization. *Diagnostic Microbiology and Infectious Disease*; 82:  
525 137-42.
- 526 Lygizos M, Sheno SV, Brooks RP, Bhushan A, Brust JC, Zeltermann D, Deng Y, Northrup V,  
527 Moll AP, Friedland GH. (2013) Natural ventilation reduces high TB transmission risk in  
528 traditional homes in rural KwaZulu-Natal, South Africa. *BMC Infectious Diseases*; 13: 300.
- 529 Martinez L, Verma R, Croda J, Horsburgh CR, Jr., Walter KS, Degner N, Middelkoop K, Koch  
530 A, Hermans S, Warner DF, et al. (2019) Detection, survival and infectious potential of  
531 *Mycobacterium tuberculosis* in the environment: a review of the evidence and epidemiological  
532 implications. *European Respiratory Journal*; 53.
- 533 May KR. (1973) The collision nebulizer: Description, performance and application. *Journal of*  
534 *Aerosol Science*; 4: 235-43.
- 535 Montagna TM, De Giglio O, Cristina LM, Napoli C, Pacifico C, Agodi A, Baldovin T, Casini  
536 B, Coniglio AM, D'Errico MM, et al. (2017) Evaluation of *Legionella* Air Contamination in  
537 Healthcare Facilities by Different Sampling Methods: An Italian Multicenter Study.  
538 *International Journal of Environmental Research and Public Health*; 14.

539 Montagna TM, Rutigliano S, Trerotoli P, Napoli C, Apollonio F, D'Amico A, De Giglio O,  
540 Diella G, Lopuzzo M, Marzella A, et al. (2019) Evaluation of Air Contamination in  
541 Orthopaedic Operating Theatres in Hospitals in Southern Italy: The IMPACT Project.  
542 International Journal of Environmental Research and Public Health; 16.  
543 Nicas M, Nazaroff WW, Hubbard A. (2005) Toward understanding the risk of secondary  
544 airborne infection: emission of respirable pathogens. Journal of Occupational and  
545 Environmental Hygiene; 2: 143-54.  
546 Patterson B, Morrow C, Singh V, Moosa A, Gqada M, Woodward J, Mizrahi V, Bryden W,  
547 Call C, Patel S, et al. (2017) Detection of Mycobacterium tuberculosis bacilli in bio-aerosols  
548 from untreated TB patients. Gates Open Research; 1: 11.  
549 Persily AK. (1997) Evaluating building IAQ and ventilation with indoor carbon dioxide. Book  
550 Evaluating building IAQ and ventilation with indoor carbon dioxide, City: American Society  
551 of Heating, Refrigerating and Air-Conditioning Engineers, Inc., Atlanta, GA (United States).  
552 Pike RM. (1976) Laboratory-associated infections: summary and analysis of 3921 cases.  
553 Health Lab Sci; 13: 105-14.  
554 Pike RM, Sulkin SE, Schulze ML. (1965) Continuing importance of laboratory-acquired  
555 infections. American journal of public health and the nation's health; 55: 190-9.  
556 Remington PL, Hall WN, Davis IH, Herald A, Gunn RA. (1985) Airborne transmission of  
557 measles in a physician's office. Journal of the American Medical Association; 253: 1574-7.  
558 Riley EC, Murphy G, Riley RL. (1978) Airborne spread of measles in a suburban elementary  
559 school. American Journal of Epidemiology; 107: 421-32.  
560 Roy CJ, Pitt MLM. (2012) Infectious disease aerobiology: Aerosol challenge methods. In  
561 Swearngen JR editor. Biodefense Research Methodology and Animal Models: CRC Press.  
562 Rufino de Sousa N, Sandström N., Shen L, Håkansson K., Vezozzo R., Udekwu K.I., Croda J,  
563 Rothfuchs AG. (2020) A fieldable electrostatic air sampler enabling tuberculosis detection in  
564 bioaerosols. Tuberculosis (Edinb); 120: 101896. In press  
565 Sulkin SE, Pike RM. (1951) Survey of laboratory-acquired infections. American journal of  
566 public health and the nation's health; 41: 769-81.  
567 Verreault D, Gendron L, Rousseau GM, Veillette M, Massé D, Lindsley WG, Moineau S,  
568 Duchaine C. (2011) Detection of Airborne Lactococcal Bacteriophages in Cheese  
569 Manufacturing Plants. Applied and Environmental Microbiology; 77: 491.  
570 Viegas C, Malta-Vacas J, Sabino R, Viegas S, Veríssimo C. (2014) Accessing indoor fungal  
571 contamination using conventional and molecular methods in Portuguese poultries.  
572 Environmental Monitoring and Assessment; 186: 1951-59.

573 Viegas S, Veiga L, Malta-Vacas J, Sabino R, Figueredo P, Almeida A, Viegas C, Carolino E.  
574 (2012) Occupational Exposure to Aflatoxin (AFB1) in Poultry Production. *Journal of*  
575 *Toxicology and Environmental Health, Part A*; 75: 1330-40.

576 Weis CP, Intrepido AJ, Miller AK, Cowin PG, Durno MA, Gebhardt JS, Bull R. (2002)  
577 Secondary aerosolization of viable *Bacillus anthracis* spores in a contaminated US Senate  
578 Office. *Journal of the American Medical Association*; 288: 2853-8.

579 WHO. (2004) *Laboratory biosafety manual* Third edition. WHO, Geneva.

580 WHO. (2009) *WHO Policy on TB infection control in health-care facilities, congregate settings*  
581 *and households*. WHO, Geneva.

582 Yang S, Lee GW, Chen CM, Wu CC, Yu KP. (2007) The size and concentration of droplets  
583 generated by coughing in human subjects. *Journal of Aerosol Medicine*; 20: 484-94.

584 Yang W, Elankumaran S, Marr LC. (2011) Concentrations and size distributions of airborne  
585 influenza A viruses measured indoors at a health centre, a day-care centre and on aeroplanes.  
586 *Journal of the Royal Society, Interface*; 8: 1176-84.

587

**A**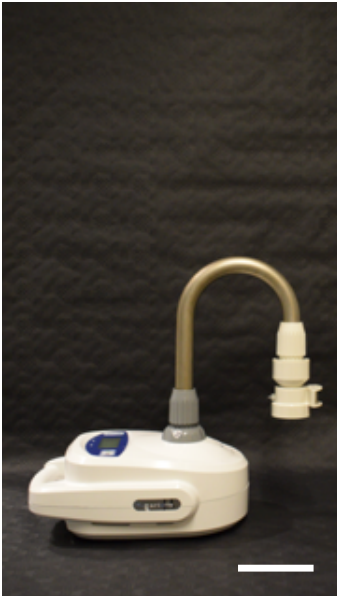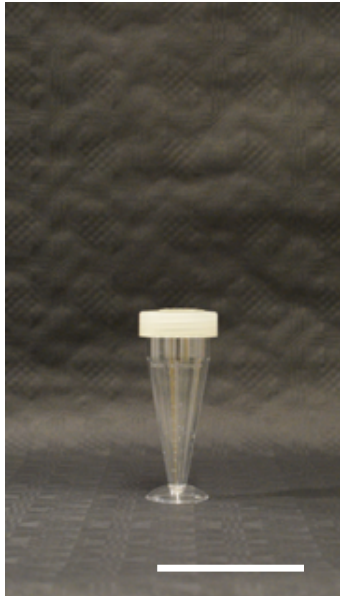**B**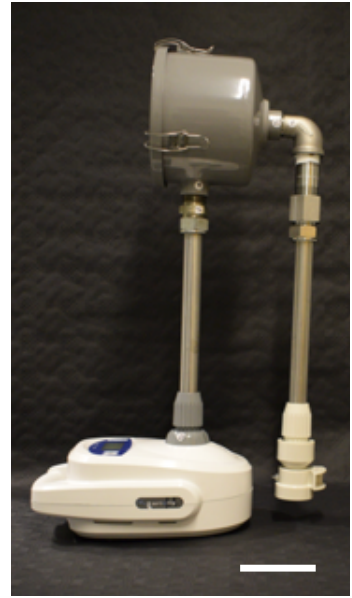**C**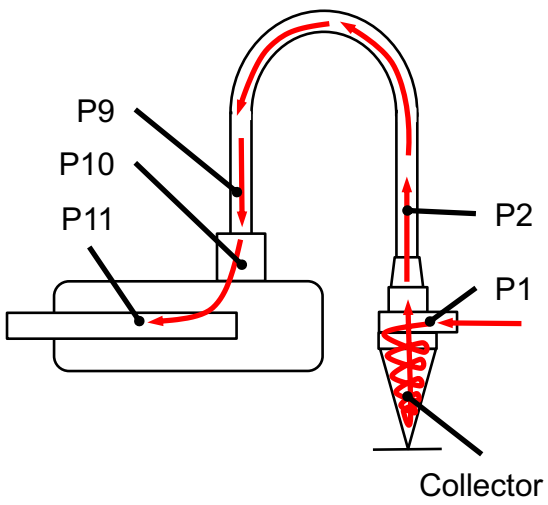**D**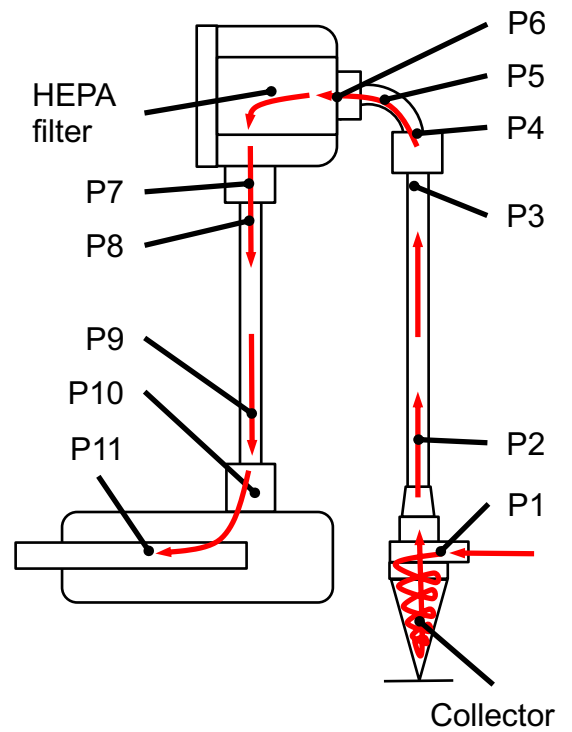**FIGURE 1**

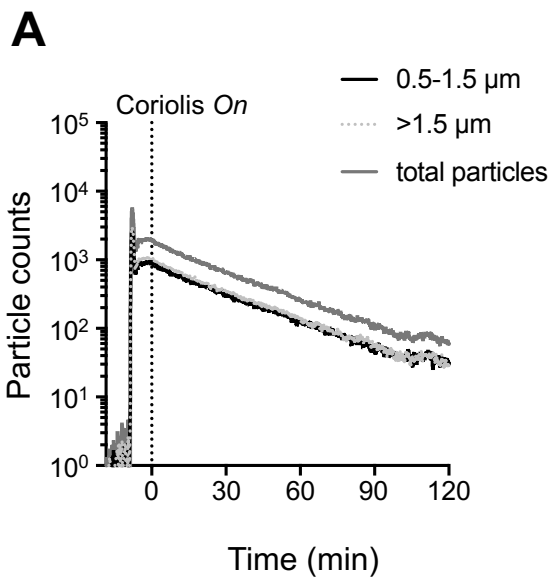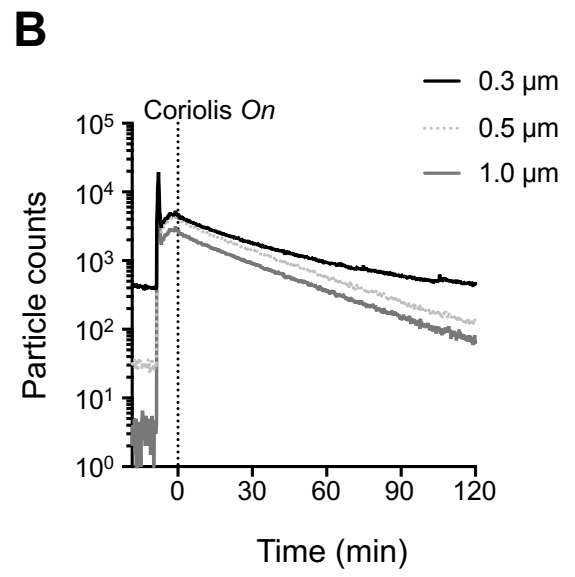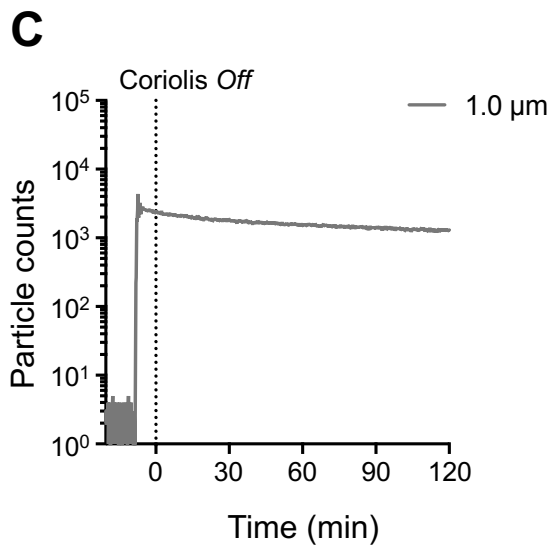

**FIGURE 2**

**A**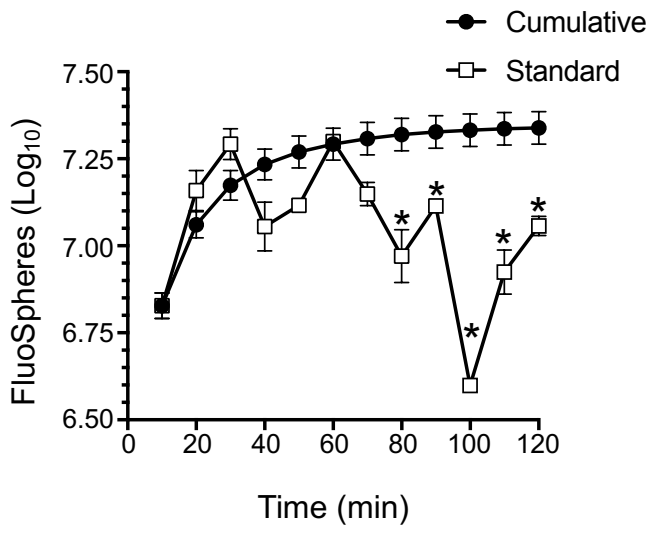**B**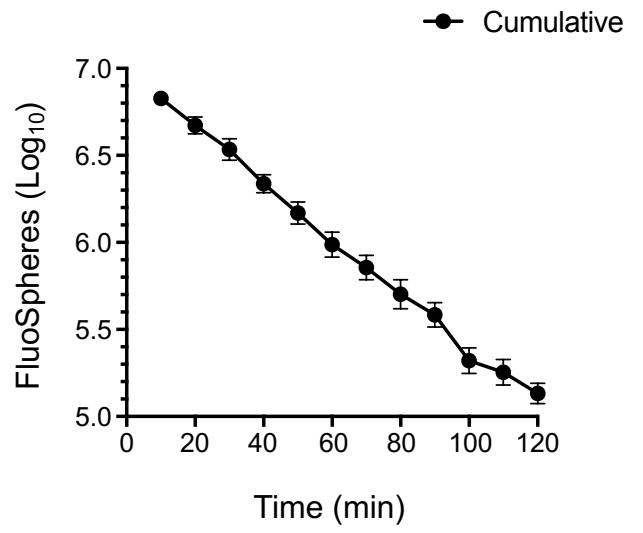**FIGURE 3**



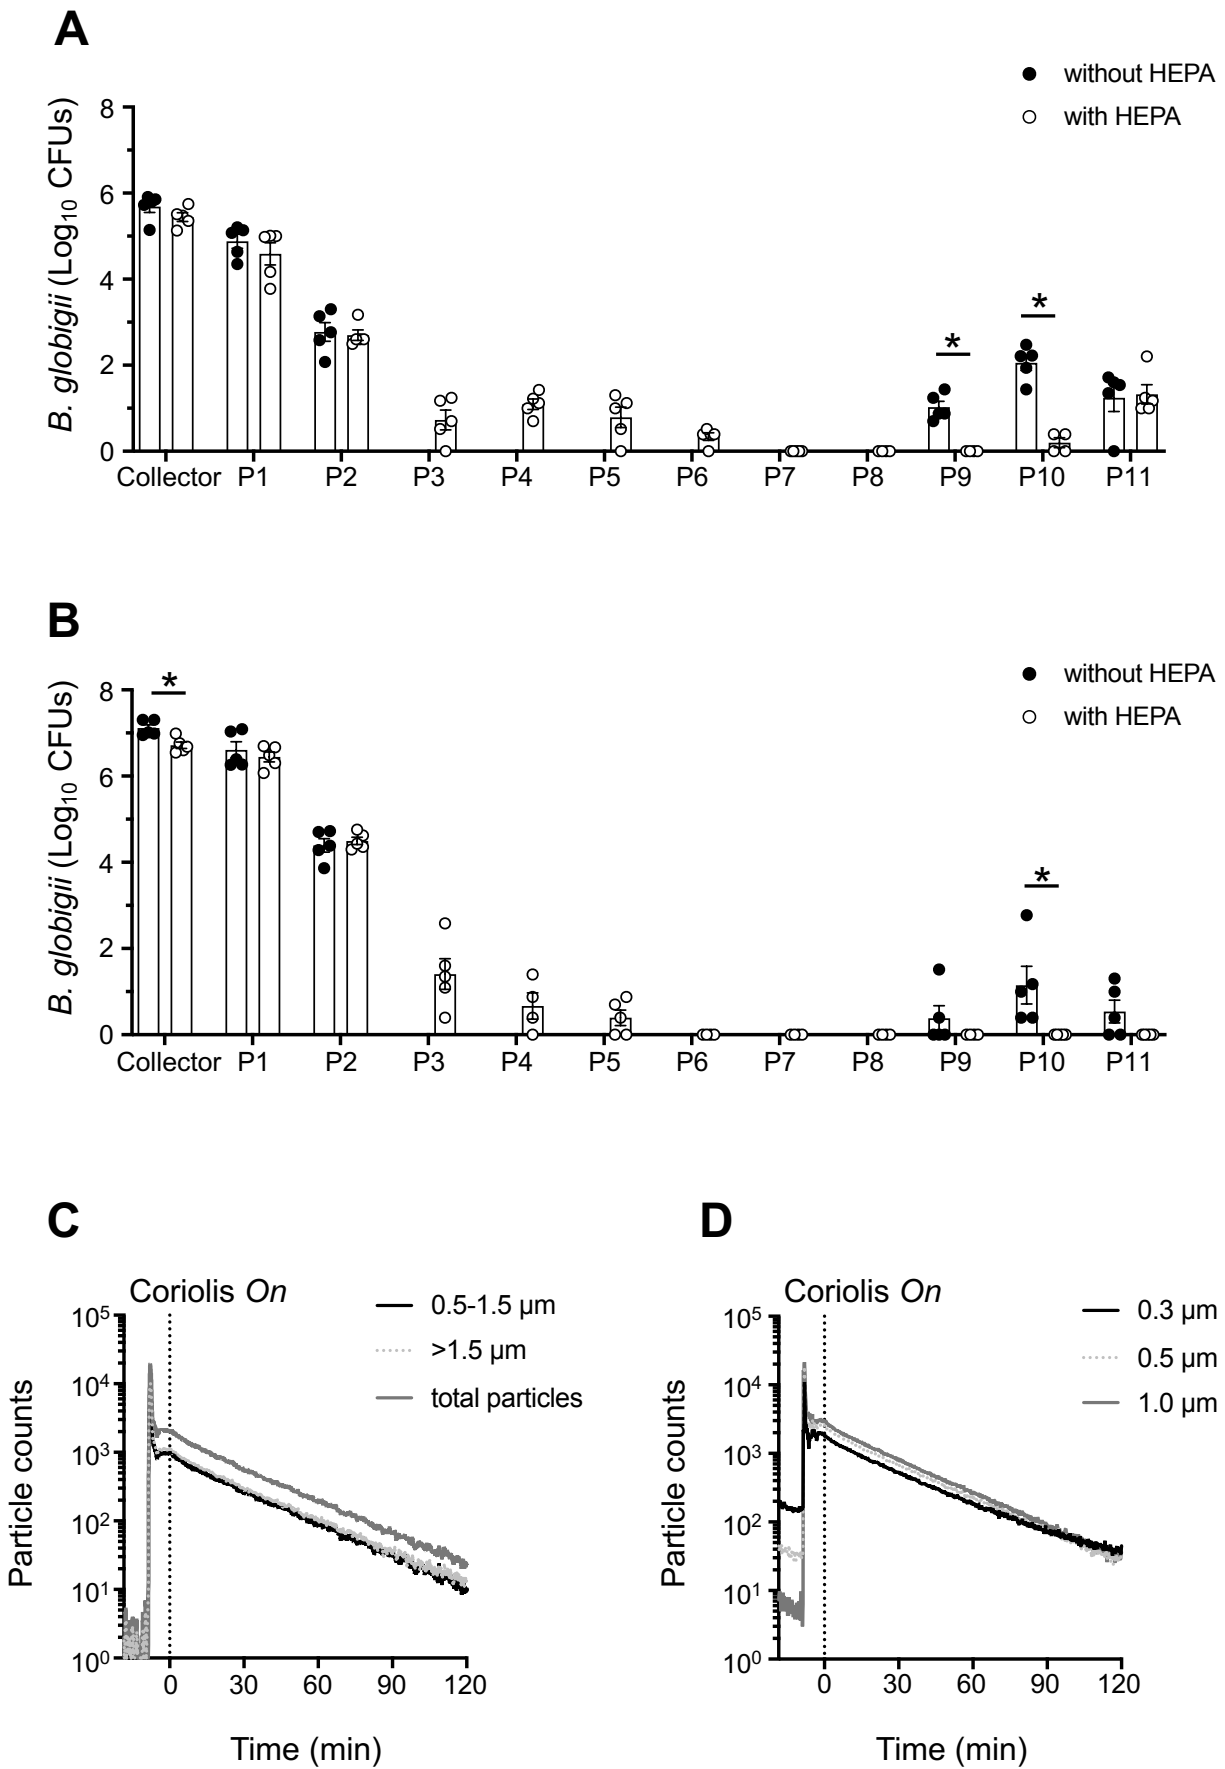

**FIGURE 4**

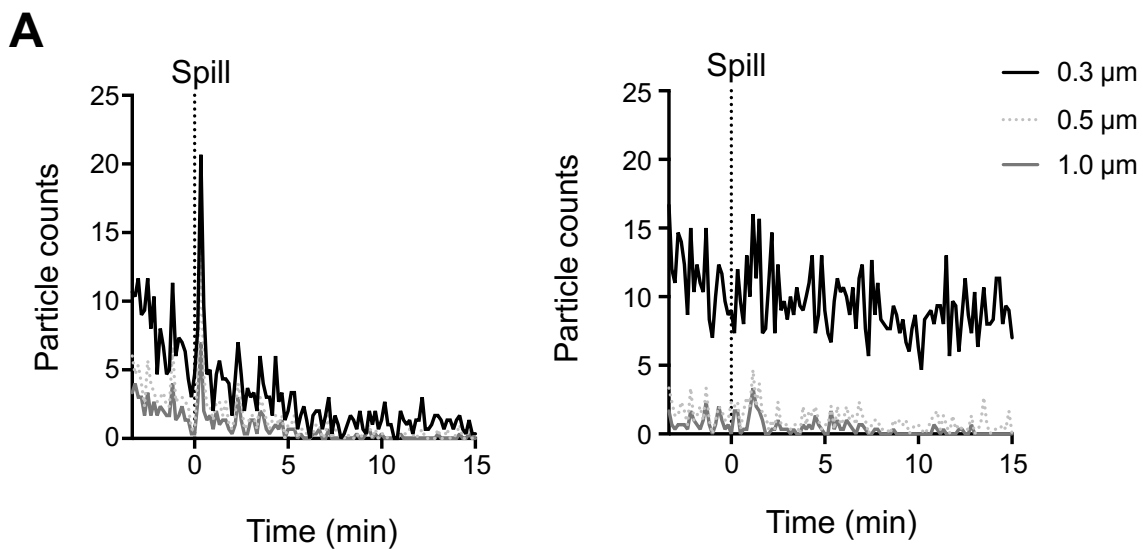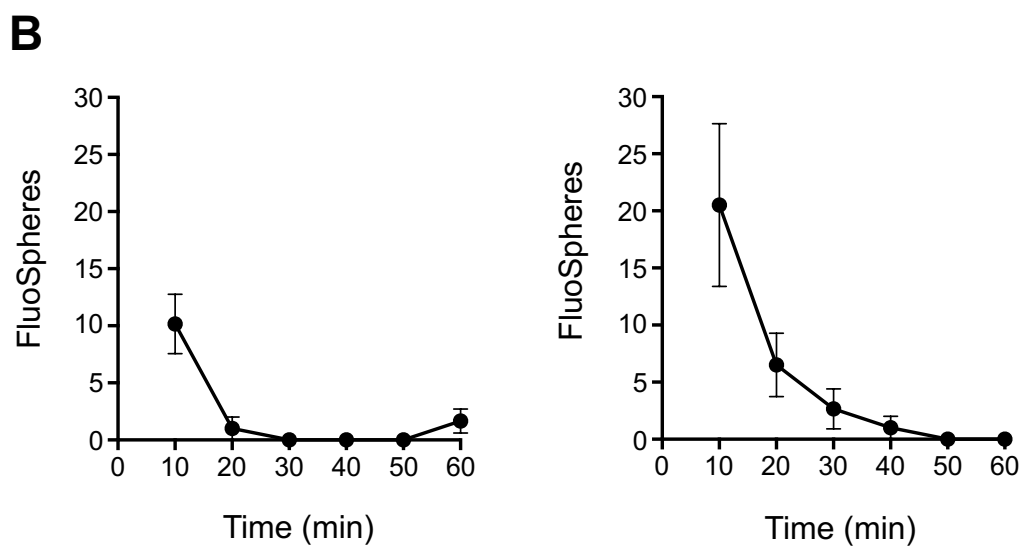

**FIGURE 5**

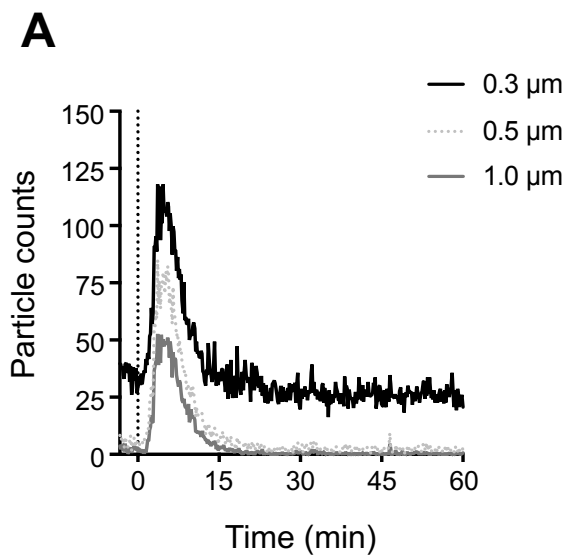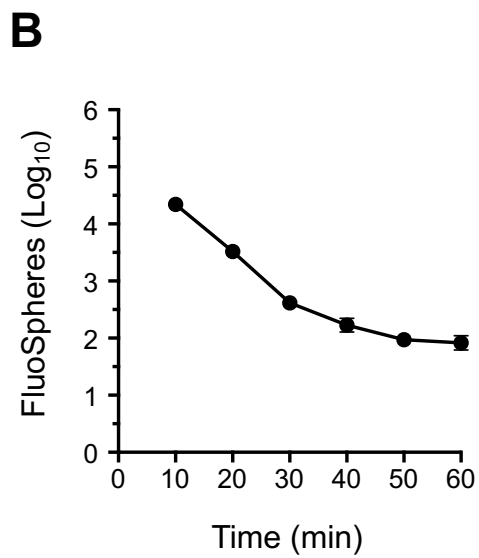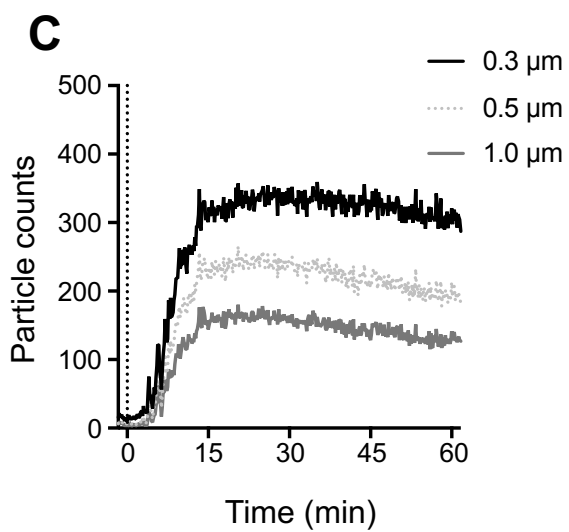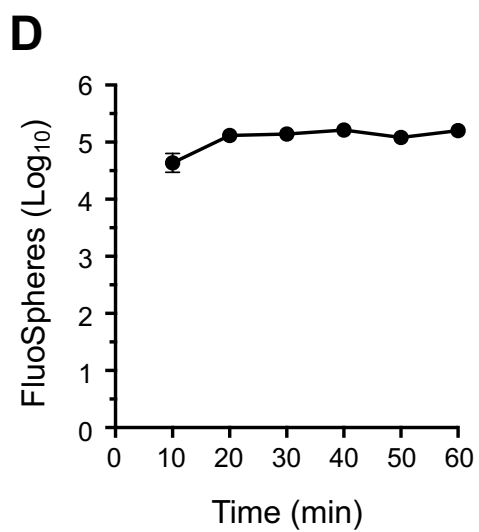

**FIGURE 6**

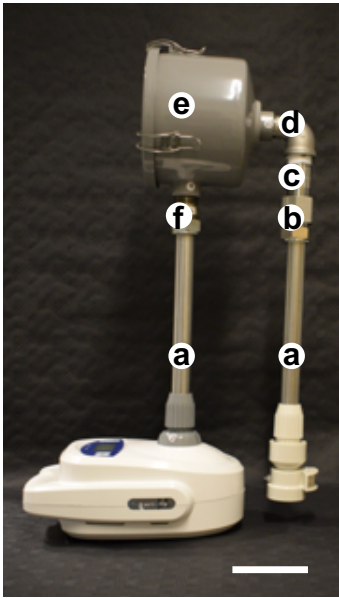

| Position | Part                   | Part nr  |
|----------|------------------------|----------|
| a        | stainless steel tubing | 8989K848 |
| b        | yor-lok fitting        | 5182K832 |
|          | yor-lok sleeve         | 5182K511 |
| c        | pipe nipple            | 4830K225 |
| d        | threaded pipe fitting  | 4464K41  |
| e        | HEPA-filter casing     | 51685K84 |
|          | HEPA filter            | 9179K16  |
| f        | yor-lok fitting        | 5929K38  |
|          | yor-lok sleeve         | 5182K511 |
